# Supplementary material for: Formation of Yolk–Shell MoS2@void@Aluminosilica Microspheres with Enhanced Electrocatalytic Activity for Hydrogen Evolution Reaction
Source: MDPI journal article supplement (doi:10.3390/en15239031), 2022-11-29
Supplement: s1 [file s1]

Article

# Formation of Yolk–Shell $\text{MoS}_2$ @void@Aluminosilica Microspheres with Enhanced Electrocatalytic Activity for Hydrogen Evolution Reaction

Li Li <sup>1,2,†</sup>, Yuanyuan Zhao <sup>1,†</sup>, Nanli Qiao <sup>3</sup>, Zhengbao Yu <sup>3</sup> and Yongxing Zhang <sup>1,4,\*</sup>

<sup>1</sup> Anhui Province Key Laboratory of Pollutant Sensitive Materials and Environmental Remediation, Department of Materials Science and Engineering, Huaibei Normal University, Huaibei 235000, China

<sup>2</sup> Laboratory of Dielectric Functional Materials, School of Materials Science & Engineering, Anhui University, Hefei 230601, China

<sup>3</sup> Greenstar (Beijing) Environmental Technology Co., Ltd., Beijing 100176, China

<sup>4</sup> Department of Chemistry, University of Science and Technology of China, Hefei 230026, China

\* Correspondence: zyx07157@mail.ustc.edu.cn

† These authors contributed equally to this work.

## Supplementary Materials

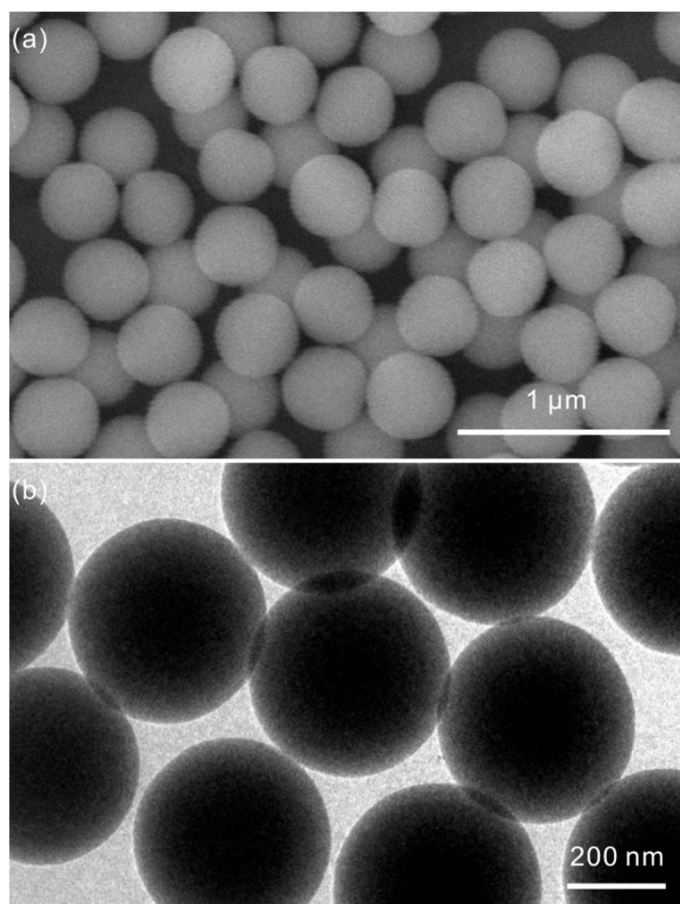

**Figure S1.** SEM (a) and TEM (b) images of  $\text{SiO}_2$  microspheres.

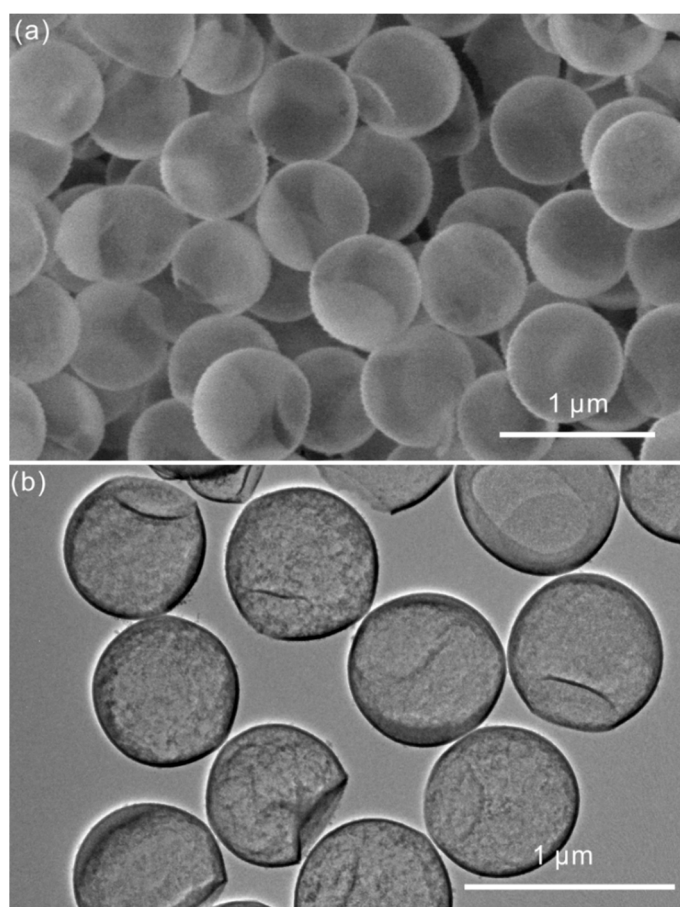

**Figure S2.** SEM (a) and TEM (b) images of hollow aluminosilica microspheres.

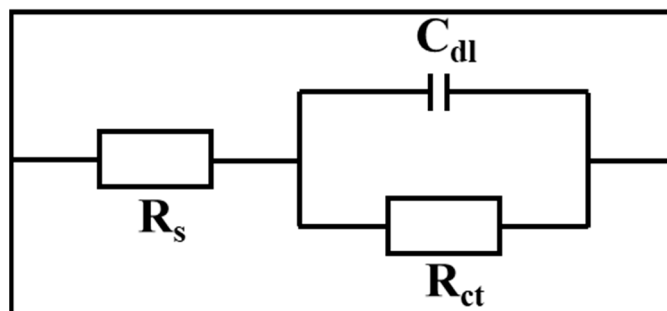

**Figure S3.** Equivalent circuit diagram ( $R_s$  is the solution resistance;  $C_{dl}$  is the double layer capacitance;  $R_{ct}$  is the charge transfer resistance).

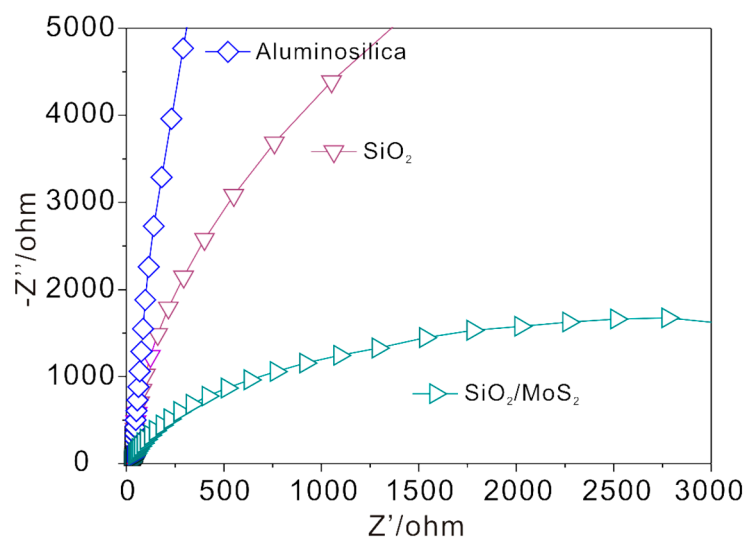

**Figure S4.** Electrochemical impedance spectroscopy of the SiO<sub>2</sub> microspheres, the hollow aluminosilica microspheres, and the MoS<sub>2</sub>@SiO<sub>2</sub> microspheres.

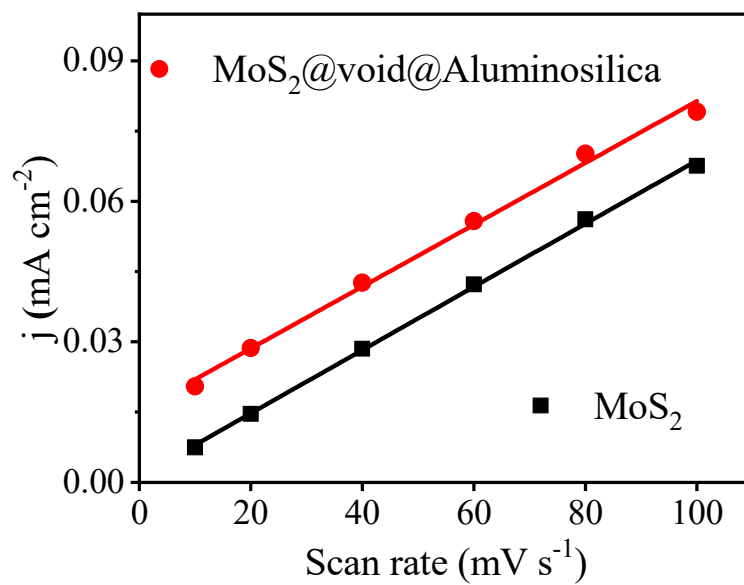

**Figure S5.** Plots of the double-layer capacitances of MoS<sub>2</sub> and MoS<sub>2</sub>@void@Aluminosilica.
